# Supplementary material
Source: PubMed Central journal article supplement (PMC5939043)
Supplement: 41422_2018_7_MOESM2_ESM.pdf [file 41422_2018_7_MOESM2_ESM.pdf]

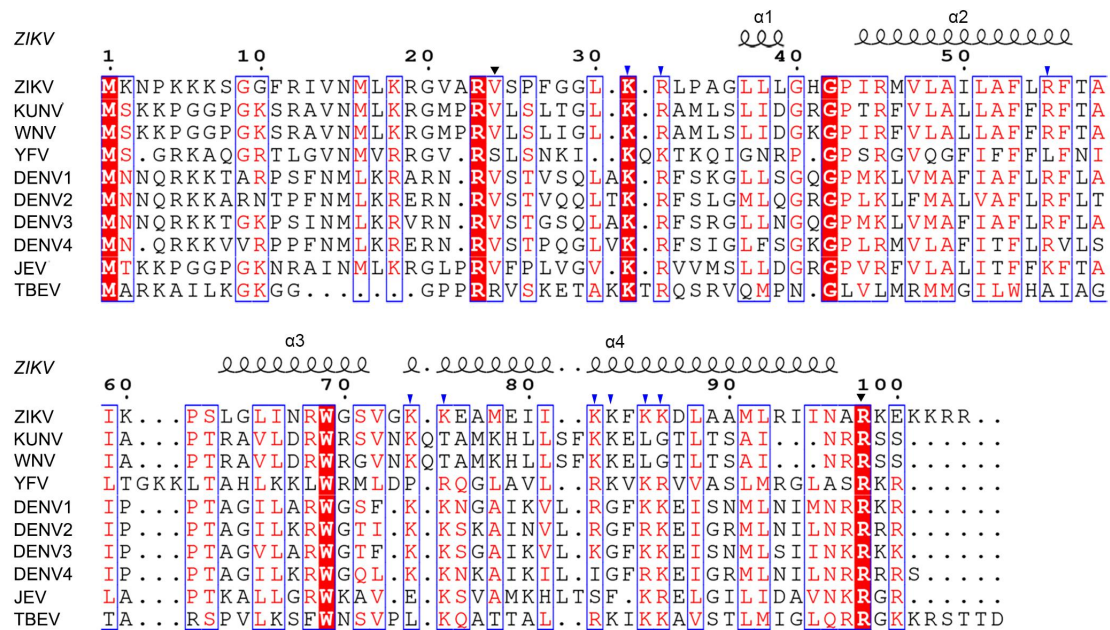

**Supplementary information, Figure S1. Sequence alignment of flavivirus C proteins by ESPrift.** The secondary structure elements of ZIKV C protein (residues 24-98) are indicated. The sequences of ZIKV (accession no. KU312312), KUNV (accession no. GenBank: D00246.1), WNV (accession no. KX547621), YFV (accession no. GQ379163), DENV1 (accession no. KJ189367), DENV2 (accession no. JX966380), DENV3 (accession no. HQ235027), DENV4 (accession no. KP723482), JEV (accession no. KF907505), TBEV (accession no. DQ401140) were obtained from GenBank. The start and end of the ZIKV C protein in the crystals are indicated by black arrowhead; the residues on the positively charged path which are conserved across species are labeled by blue arrowhead.
