# Supplementary material
Source: PubMed Central journal article supplement (PMC5939043)
Supplement: 41422_2018_7_MOESM3_ESM.pdf [file 41422_2018_7_MOESM3_ESM.pdf]

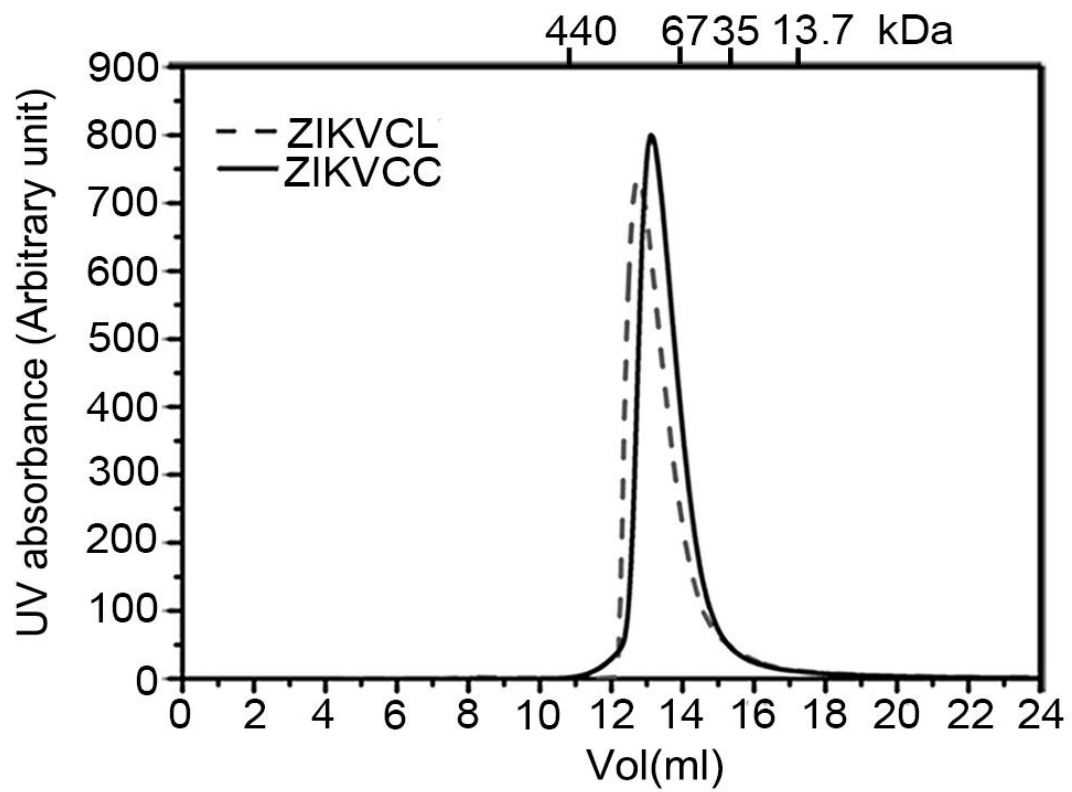

**Supplementary information, Figure S2. The size exclusion chromatogram (superdex 200 10/300 GL) of ZIKV C protein. ZIKVCL in gray dashed line; ZIKVCC in black solid line.**
