# Supplementary material
Source: PubMed Central journal article supplement (PMC5939043)
Supplement: 41422_2018_7_MOESM4_ESM.pdf [file 41422_2018_7_MOESM4_ESM.pdf]

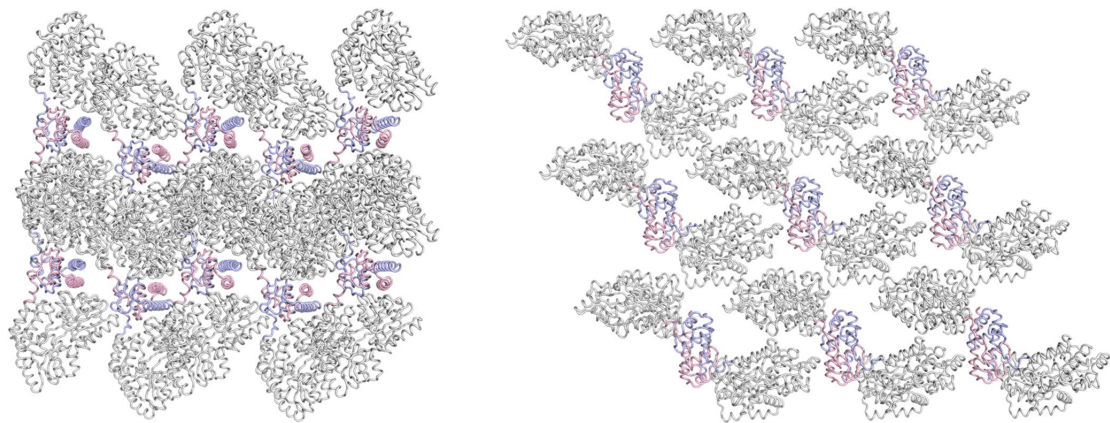

**Supplementary information, Figure S3. The packing mode of ZIKVCC in the high-resolution crystals.** The two ZIKV C protomers are colored in light blue and light pink, respectively; MBP is in gray.
