# Supplementary material
Source: PubMed Central journal article supplement (PMC5939043)
Supplement: 41422_2018_7_MOESM5_ESM.pdf [file 41422_2018_7_MOESM5_ESM.pdf]

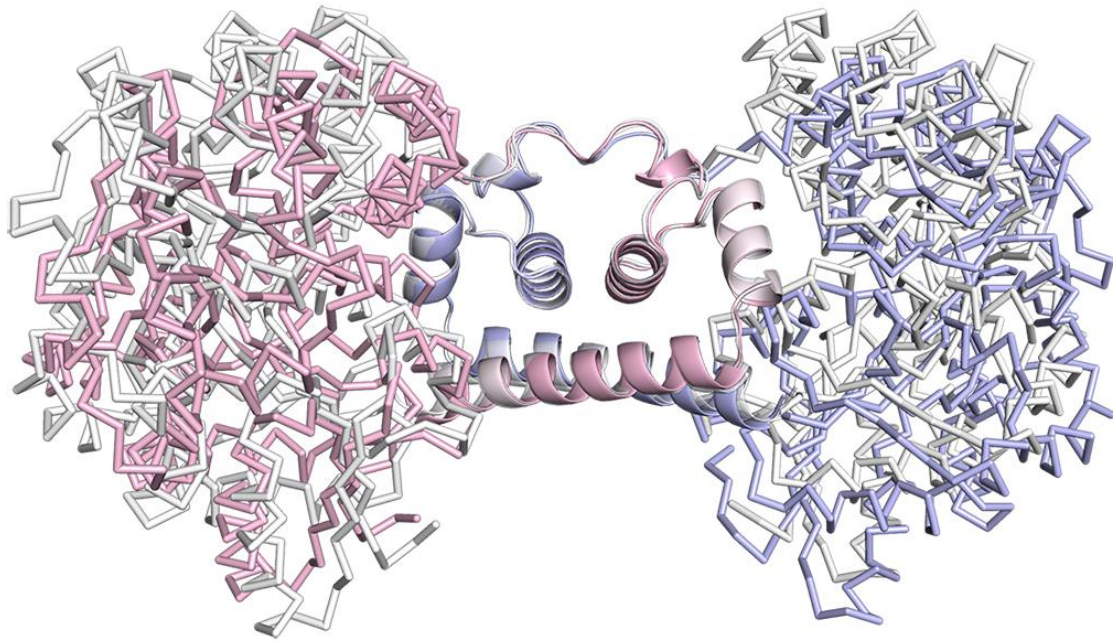

**Supplementary information, Figure S4. The structural alignment of ZIKV C proteins in the two different crystals.** The crystal structure at a high-resolution colored in light blue and light pink; the low-resolution structure was colored in gray.
