# Supplementary material
Source: PubMed Central journal article supplement (PMC5939043)
Supplement: 41422_2018_7_MOESM6_ESM.pdf [file 41422_2018_7_MOESM6_ESM.pdf]

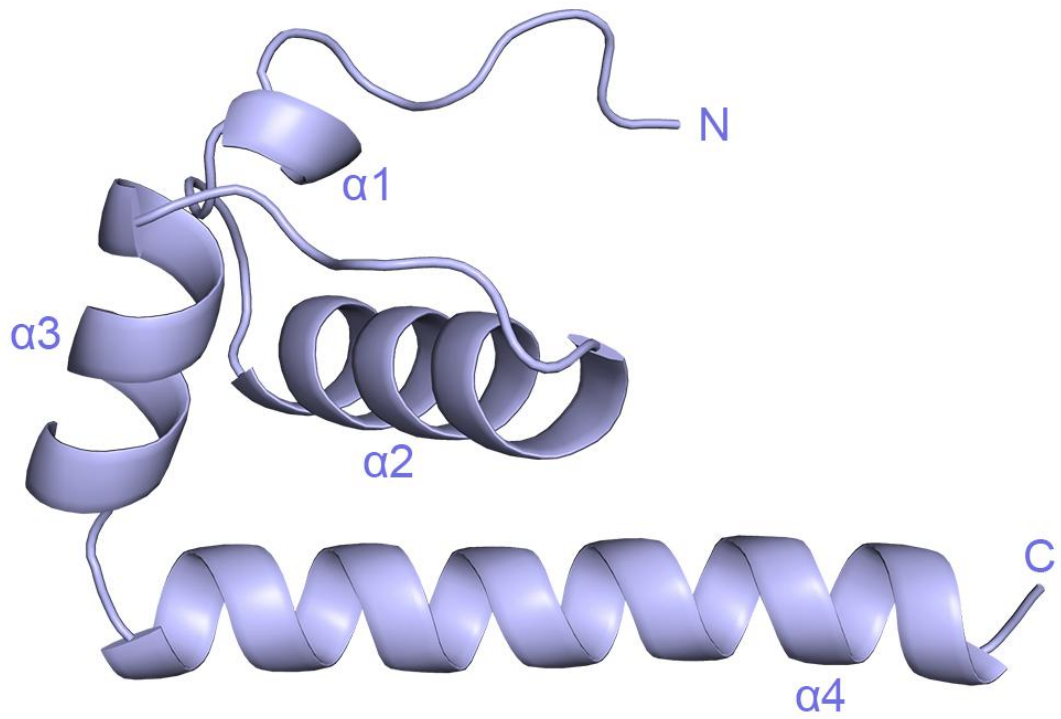

**Supplementary information, Figure S5. Ribbon diagram of the ZIKV C protein protomer and colored with light blue.**
