# Supplementary material
Source: PubMed Central journal article supplement (PMC5939043)
Supplement: 41422_2018_7_MOESM7_ESM.pdf [file 41422_2018_7_MOESM7_ESM.pdf]

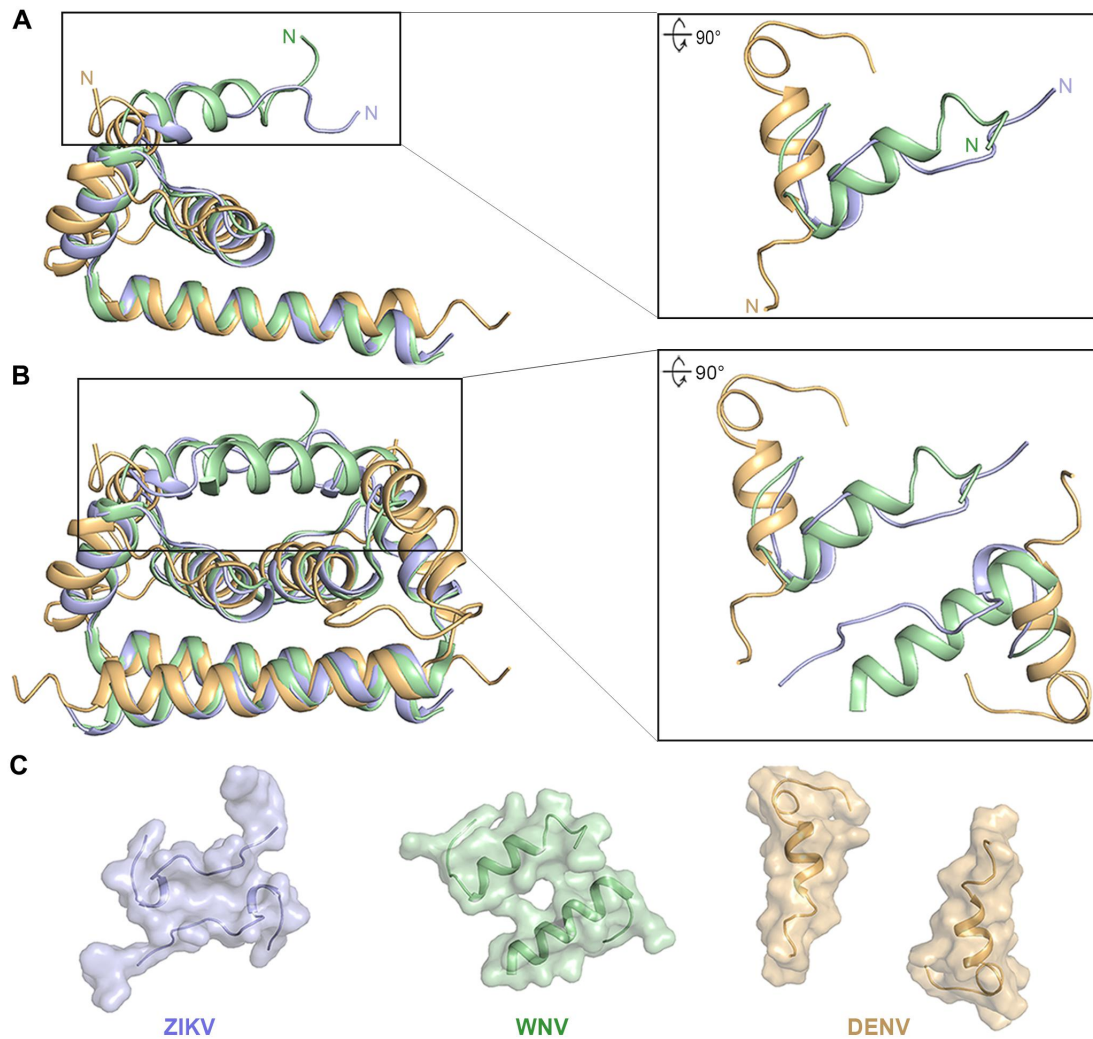

**Supplementary information, Figure S6. The structural alignment of the flavivirus C proteins from ZIKV, WNV and DENV with close-up views. (A)-(B) Comparison of the flavivirus C protein structures. (C) Cartoon and surface representation of the N-termini of the flavivirus C proteins. ZIKV C protein in light blue; WNV C protein (PDB ID: 1SFK) in pale green; DENV C protein (PDB ID: 1R6R) in light orange.**
