# Supplementary material
Source: PubMed Central journal article supplement (PMC5939043)
Supplement: 41422_2018_7_MOESM8_ESM.pdf [file 41422_2018_7_MOESM8_ESM.pdf]

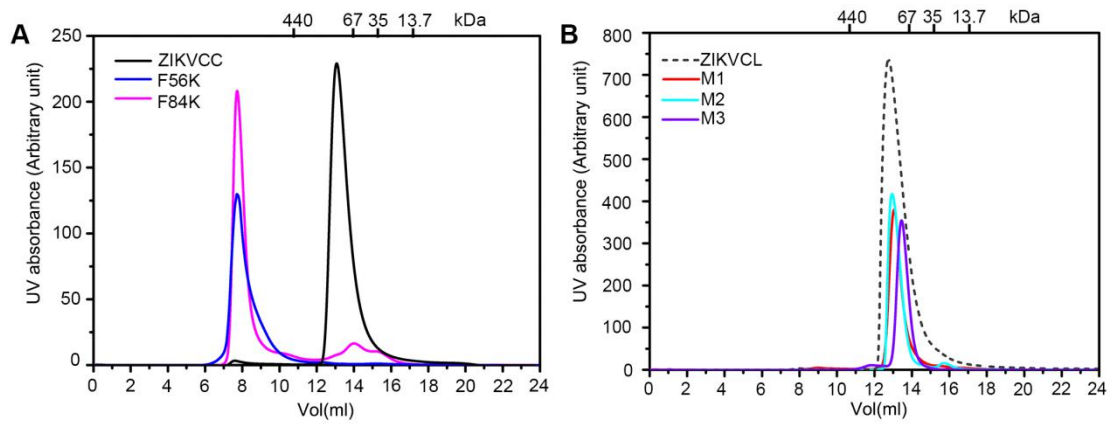

**Supplementary information, Figure S7. The size exclusion chromatograms (superdex 200 10/300 GL) of the ZIKV C protein.** (A) Profiles of WT ZIKVCC and its mutants. ZIKVCC in black solid line; F56K in blue solid line; F84K in magenta solid line. (B) WT ZIKVCL and its mutants. ZIKVCL in black dash line; M1 in red solid line; M2 in cyan solid line; M3 in violet solid line.
