# Supplementary material
Source: PubMed Central journal article supplement (PMC5939043)
Supplement: 41422_2018_7_MOESM9_ESM.pdf [file 41422_2018_7_MOESM9_ESM.pdf]

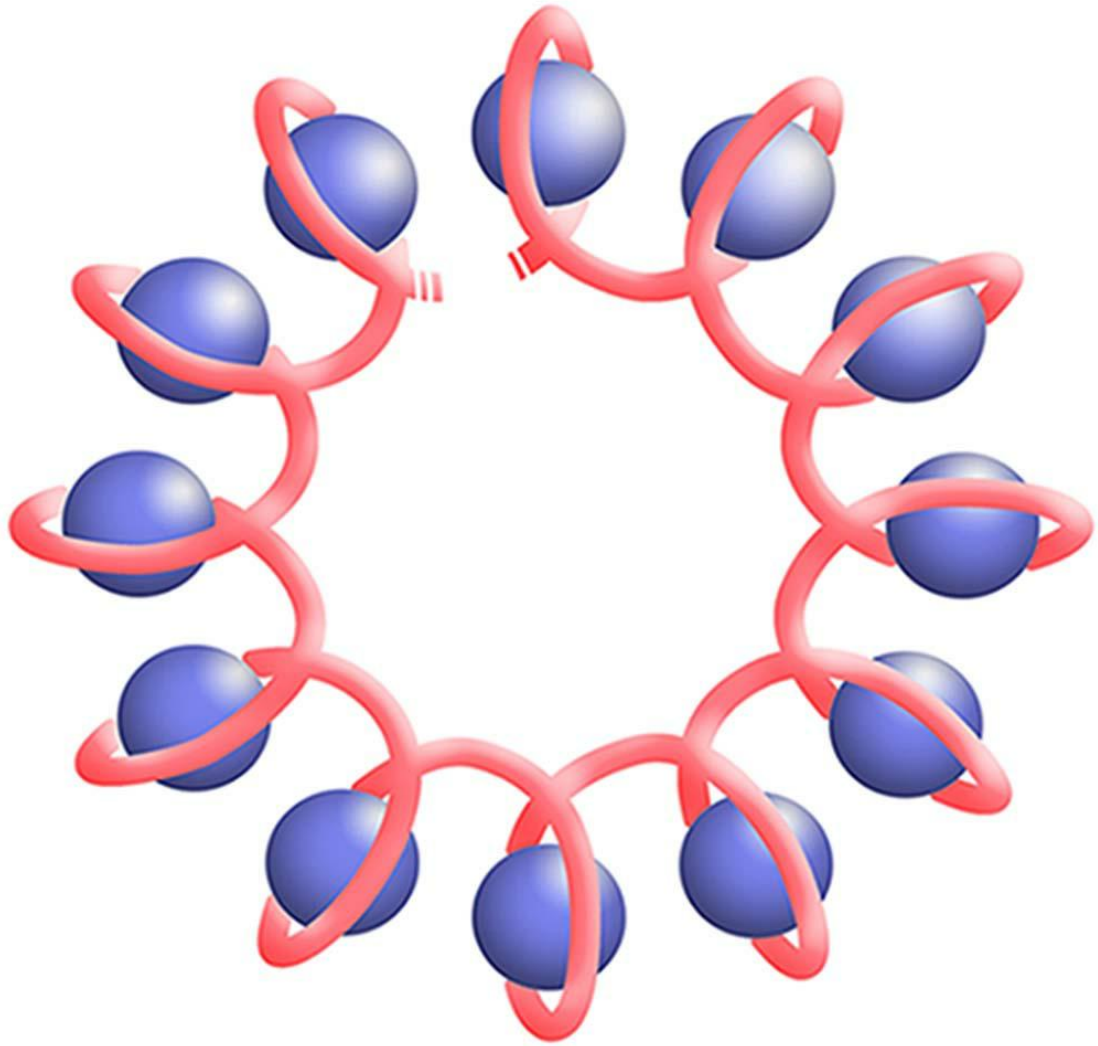

**Supplementary information, Figure S8. Model for the ZIKV C protein encapsulating viral RNA.** The C protein interacts with and packages the single-stranded viral RNA genome to form a ribonucleoprotein complex. The ZIKV C dimeric molecule in light blue; viral RNA in light red.
