# Supplementary material
Source: PubMed Central journal article supplement (PMC5939043)
Supplement: 41422_2018_7_MOESM10_ESM.pdf [file 41422_2018_7_MOESM10_ESM.pdf]

**Supplementary information, Table S1. X-ray data collection, processing and refinement statistics.**

| Statistics                                                 | ZIKV C protein                         |                                         |
|------------------------------------------------------------|----------------------------------------|-----------------------------------------|
|                                                            | Data 1                                 | Data 2                                  |
| <b>Data Collection</b>                                     |                                        |                                         |
| X-ray Source                                               | SSRF beamline BL18U1                   | Diamond Beamline I04                    |
| Wavelength (Å)                                             | 0.97791                                | 0.97950                                 |
| Space group                                                | $P2_1$                                 | $P2_1$                                  |
| Unit cell a, b, c, $\alpha$ , $\beta$ , $\gamma$<br>(Å, °) | 74.3, 81.4, 77.2, 90.0,<br>104.8, 90.0 | 63.1, 223.1, 85.2, 90.0,<br>110.0, 90.0 |
| Resolution range (Å)                                       | 50.0-2.05 (2.09-2.05)*                 | 50.0-2.90 (2.95-2.90)                   |
| Unique reflections                                         | 55,737 (2,177)                         | 46,037 (2,247)                          |
| Completeness (%)                                           | 94.7 (75.1)                            | 95.9 (95.2)                             |
| Redundancy                                                 | 4.4 (2.6)                              | 6.1 (5.4)                               |
| $I/\sigma(I)$                                              | 10.5 (1.0)                             | 5.9 (1.0)                               |
| $R_{\text{merge}}$ (%)                                     | 17.8 (65.0)                            | 23.5 (0.00**)                           |
| <b>Refinement</b>                                          |                                        |                                         |
| Resolution range (Å)                                       | 48.3-2.05 (2.12-2.05)                  | 45.8-2.91 (3.02-2.91)                   |
| Reflections used<br>in refinement                          | 53,145 (4,486)                         | 45,995 (4,406)                          |
| Reflections used<br>for R-free                             | 1,912 (174)                            | 2,339 (251)                             |
| $R_{\text{work}}$ (%)                                      | 22.1 (29.7)                            | 20.4 (29.8)                             |
| $R_{\text{free}}$ (%)                                      | 25.4 (31.6)                            | 24.8 (33.8)                             |
| Number of non-hydrogen<br>atoms                            | 7,299                                  | 13,947                                  |
| Protein                                                    | 6,879                                  | 13,723                                  |
| Ligands                                                    | 46                                     | 92                                      |
| solvent                                                    | 374                                    | 132                                     |
| Average B-factors                                          | 39.6                                   | 46.9                                    |
| Protein                                                    | 39.5                                   | 47.0                                    |
| Ligands                                                    | 39.7                                   | 34.8                                    |
| solvent                                                    | 40.9                                   | 38.2                                    |
| r.m.s. deviations                                          |                                        |                                         |
| Bond lengths (Å)                                           | 0.004                                  | 0.005                                   |
| Bond angles (°)                                            | 1.06                                   | 0.75                                    |
| Ramachandran                                               |                                        |                                         |
| Favored (%)                                                | 98.2                                   | 98.9                                    |
| Allowed (%)                                                | 1.8                                    | 1.1                                     |
| Outliers (%)                                               | 0.0                                    | 0.0                                     |

\* Numbers in the brackets are for the highest resolution shell.

\*\*  $R_{\text{free}} > 1$
